# Supplementary material for: Splitting methanol on ultra-thin MgO(100) films deposited on a Mo substrate
Source: Royal Society of Chemistry journal article supplement (doi:10.1039/c6cp08123a), 2017-01-01
Supplement: c6cp08123a1.pdf [file c6cp08123a1.pdf]

## Splitting methanol on ultra-thin MgO(100) films deposited on a Mo substrate

Zhenjun Song,<sup>ab</sup> Hu Xu<sup>a</sup>

<sup>a</sup>Department of Physics, Southern University of Science and Technology, Shenzhen 518055, China

<sup>b</sup>Department of Chemistry, Nankai University, Tianjin 300071, China.

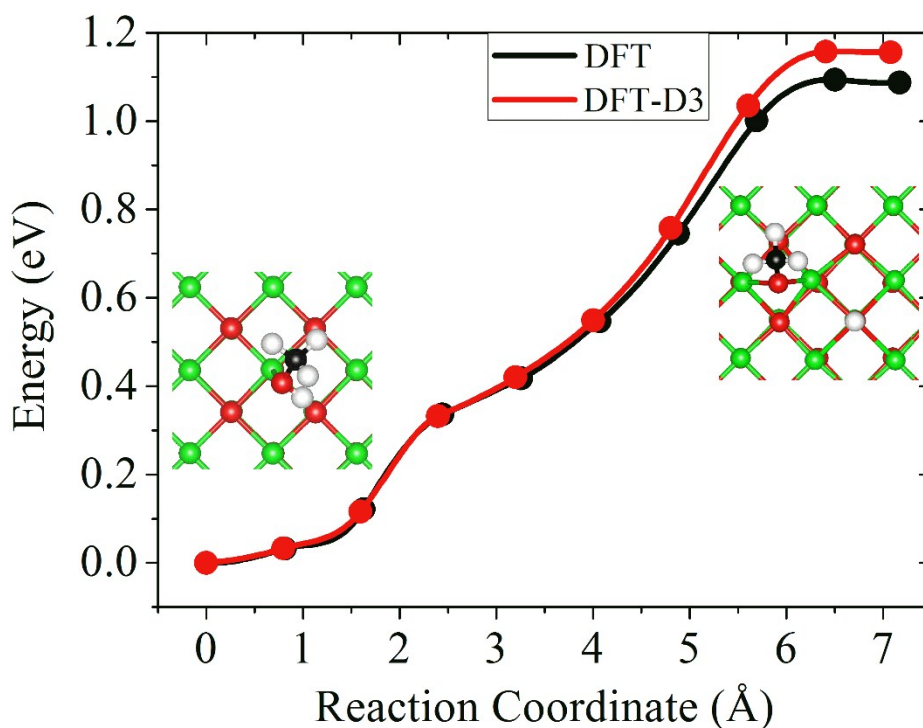

**Figure S1.** Potential energy profiles for the dissociation pathway of methanol (A  $\rightarrow$  D) on the stoichiometric MgO(100) surface at DFT and DFT-D3 theoretical levels.

**Table S1.** Calculated bond lengths and surface rumplings of the  $n$  MgO layer of methanol adsorbed onto the MgO(100) at DFT-D3 level. All units are set in Å.

|                | Bond length |        | Bond length | Layer $n$ | $\Delta z_n^a$ |
|----------------|-------------|--------|-------------|-----------|----------------|
| C–Om           | 1.43        | Mgs–O1 | 2.24        | 1         | 0.138          |
| Om–H1          | 1.01        | Mgs–O2 | 2.15        | 2         | 0.042          |
| Om–Mgs         | 2.18        | Mgs–O3 | 2.08        | 3         | 0.014          |
| H1 $\cdots$ O1 | 1.72        | Mgs–O4 | 2.13        | 4         | 0.014          |

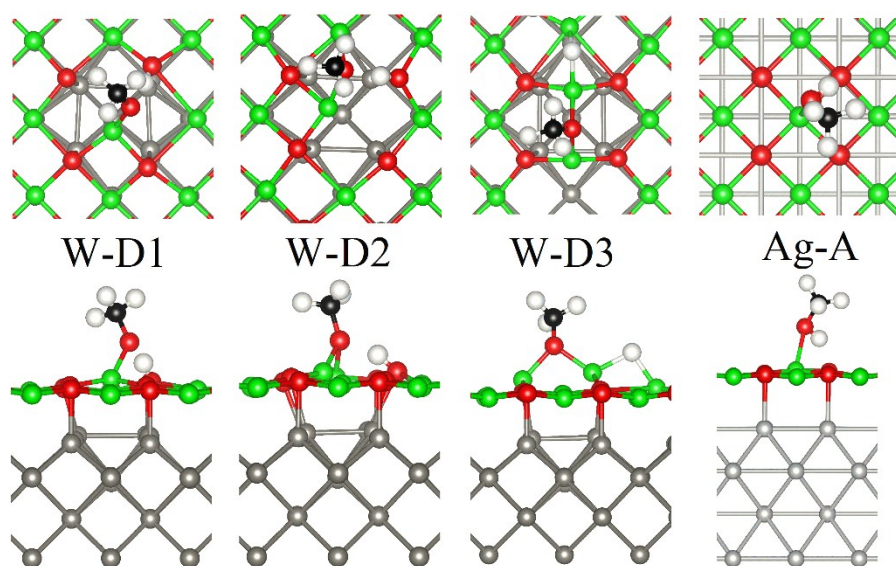

**Figure S2.** The adsorption geometries of methanol on the 1 ML MgO(100)/W(100) in the dissociative adsorption states (W-D1, W-D2 and W-D3) and the adsorption of methanol on the 1 MgO(100)/Ag(100) in the molecular form (Ag-A).
